# Supplementary material for: Field parcellation of the human hippocampus along the longitudinal axis
Source: Research Square preprint supplement (doi:10.21203/rs.3.rs-2821441/v1), 2023-04-19
Supplement: Supplementary file 1 [file afef3b3e4aeadb693b44a545.docx]

**SUPPLEMENTARY MATERIAL**

**
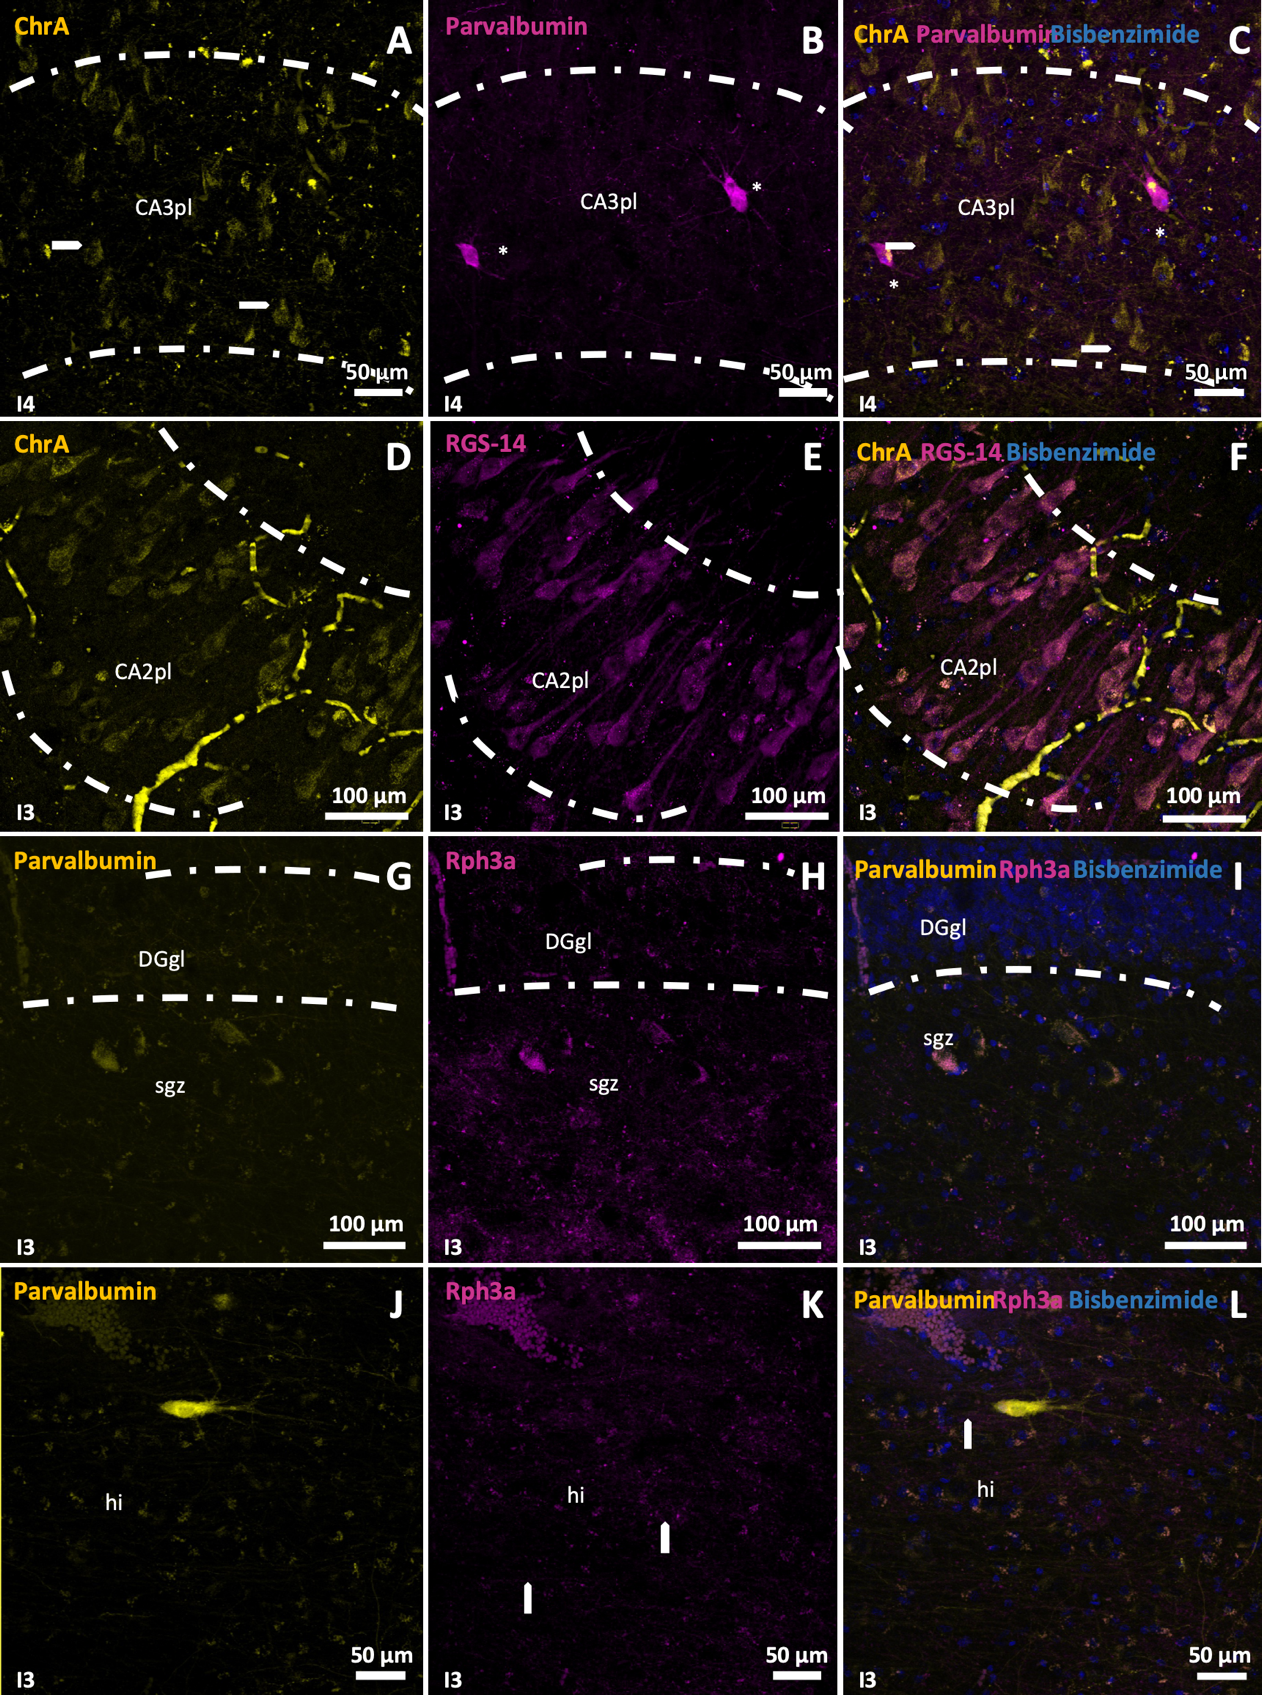
**

**Supplementary Fig. 1**: Confocal microscopy images showing the distribution of Chromogranin A, Rph3a, RGS-14 at cellular level in the human hippocampus. A-C: Chromogranin A is expressed in pyramidal neurons (arrowhead), but not interneurons (asterisk) along lateral CA3 and CA2. D-F: In CA2 pyramidal layer Chromogranin A shows widespread co-expression with RGS-14 in pyramidal cells. G-L: Rph3a in expressed in fibers and terminals across the hilus (arrowhead). Cytoplasmic expression is restricted to Parvalbumin+ interneurons of the subgranular zone (see G-I and J-L).

**
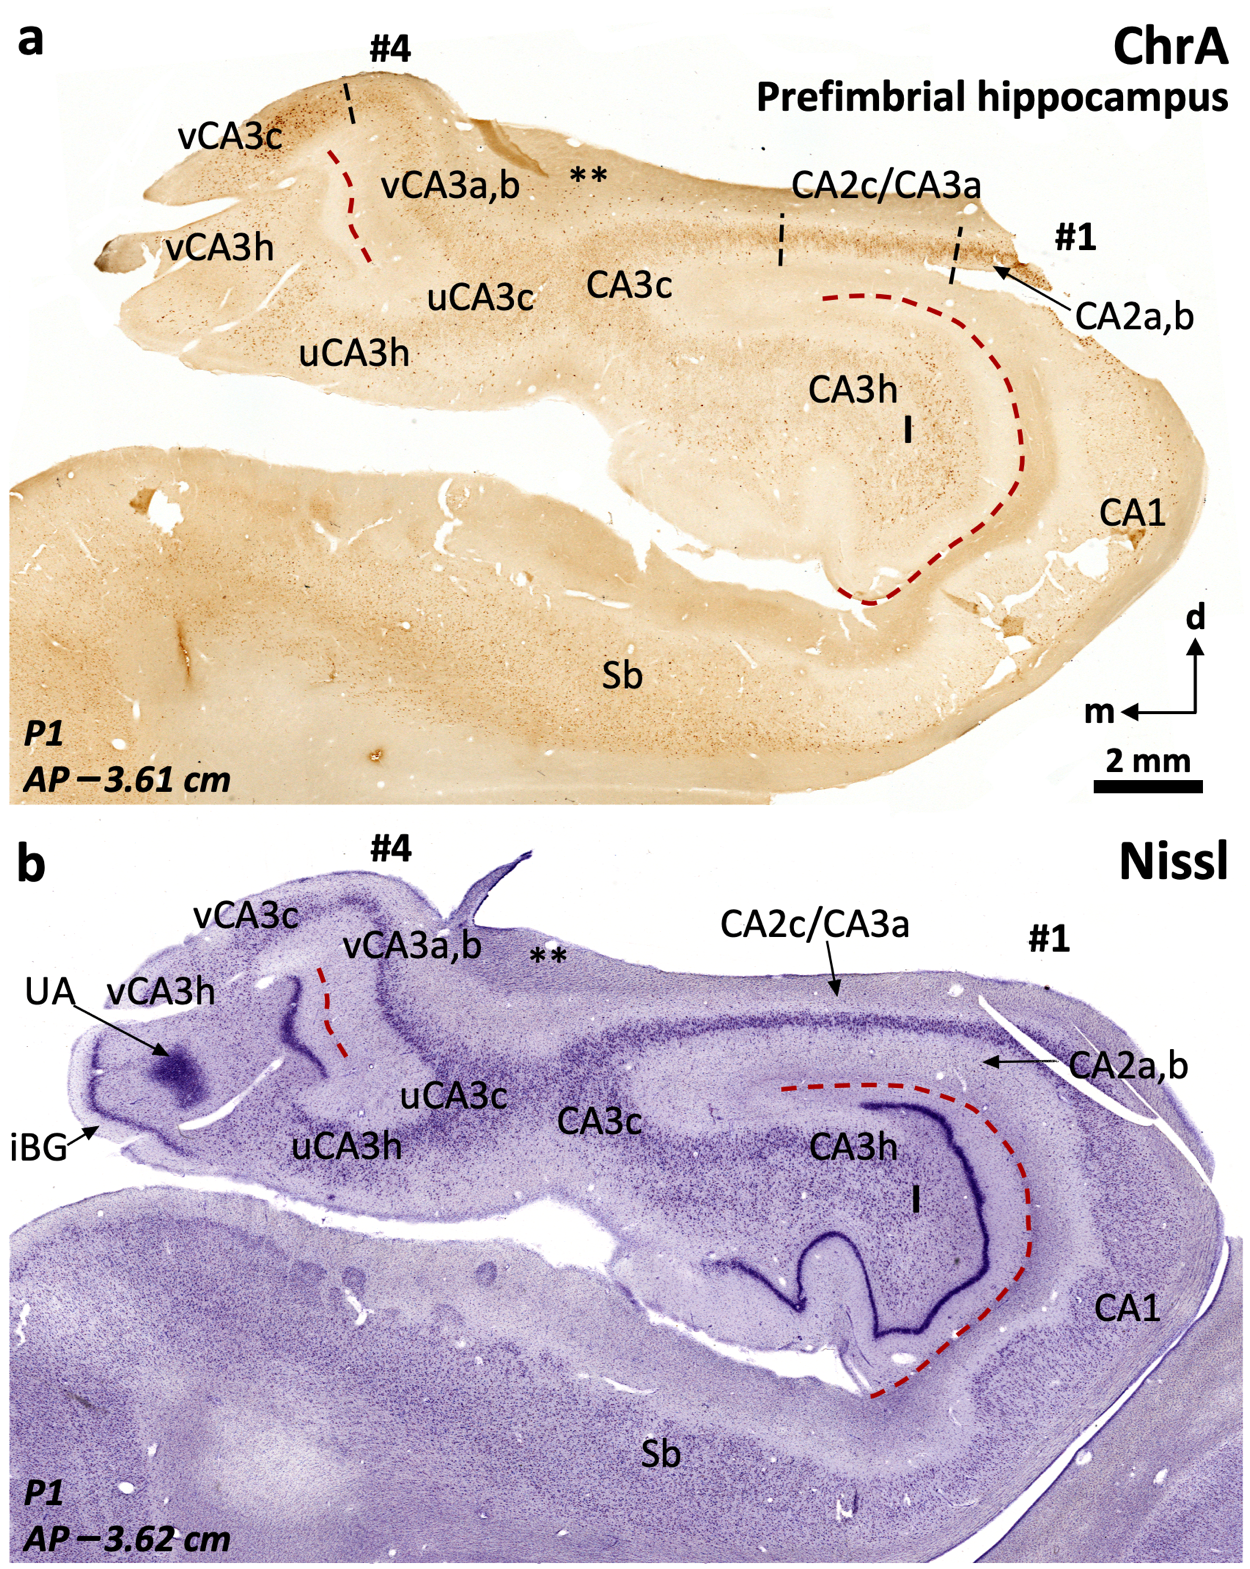
**

**Supplementary Fig. 2**: Continuity of CA3 in the perifimbrial rostral hippocampus near the uncal apex. The uncal portion of CA3 reaches the hilar region of the vertical hippocampus from lateral to medial. The vertical dentate gyrus is, at this point, inverted. The caudal concavity of the dentate gyrus at this level is the uncal apex (UP).

**
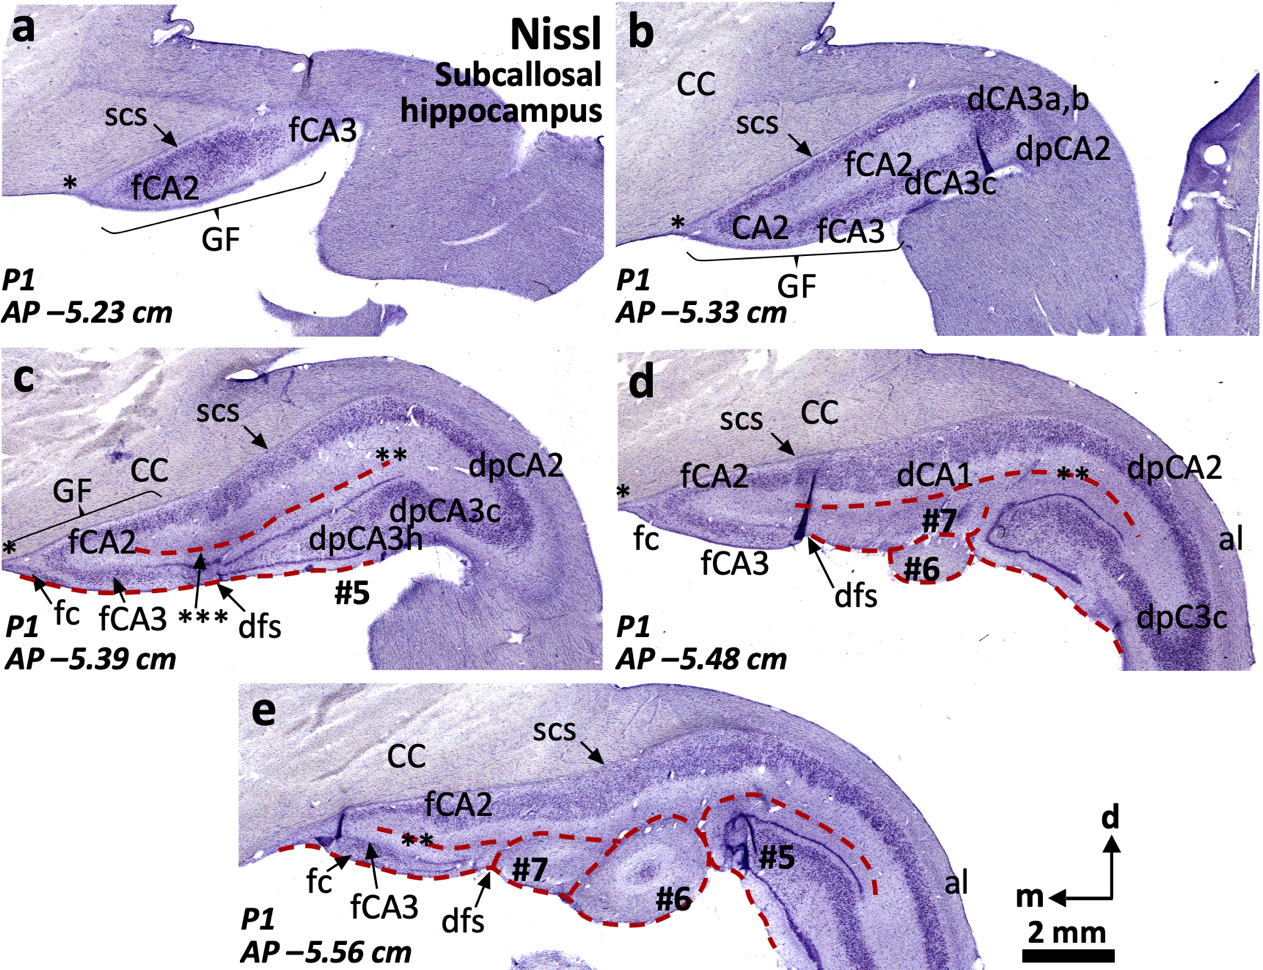
**

**Supplementary Fig. 3**: Rostrocaudal organization of the subcallosal hippocampus. The subcallosal region of the hippocampus is composed by the gyrus fasciolaris (GF, composed by modified CA2 and CA3 fields, fCA2-3), the *fasciola cinerea* (fc), the dorsalmost region of the posterior hippocampus and dentate gyrus (#5) and the gyri of Andreas Retzius (lateral #6 and medial #7). The dentatofasciolar sulcus (dfs) is a medial expansion of the inner blade of the posterior hippocampal fissure (** in C, D, E) near the point where it becomes superficial (***). The *fasciola cinerea*, which is a rudimentary dentate gyrus, is organized around the dfs. Note the presence of a vestigial dorsal o fasciolar fimbriodentate junction (*) attached to the ventral surface of the *corpus callosum* (CC). Abbreviations: scs, subcallosal sulcus

**
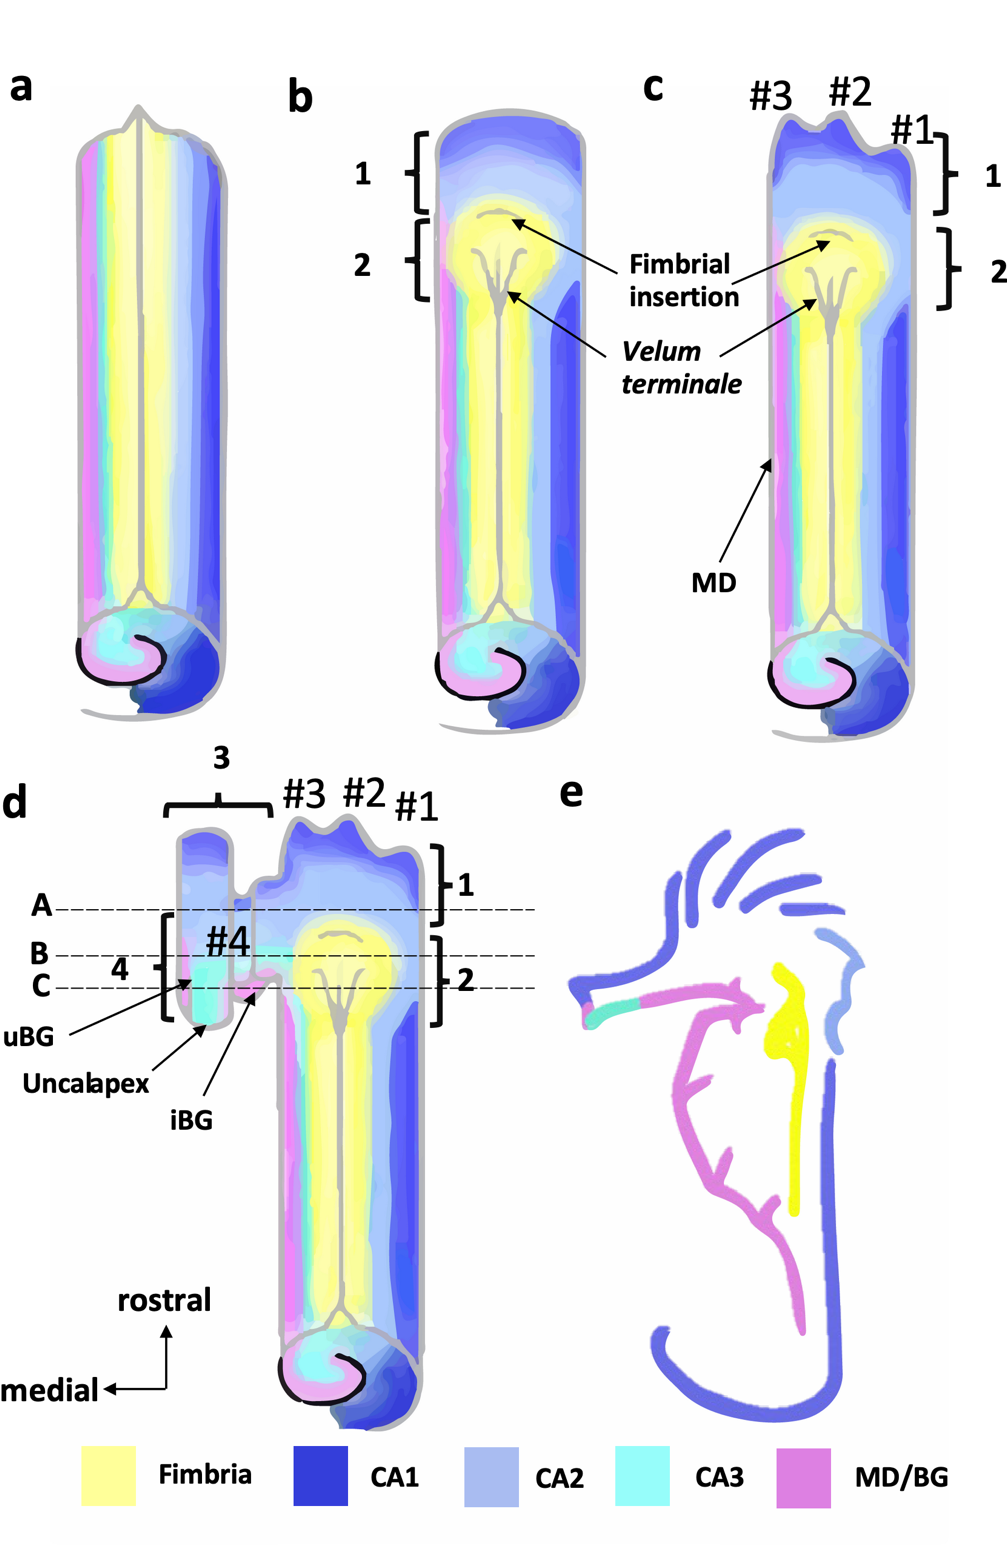
**

**Supplementary Fig. 4**: Horse-headed silkworm. A diagrammatic, step-wise representation of the hippocampal head is offered from a zenithal view. The canonical ‘silkworm-like’ morphology of the middle hippocampus (A) is altered at the rostral pole of the hippocampus, where CA2 surrounds the rostral insertion (B) of the fimbria (C) defining a prefimbrial area (1) and a perifimbrial region (2). The prefimbrial region (C) develops indentations that correlate to the underlying digitations of the dentate gyrus (MD/BG). The boundaries between CA2 and CA1 follow the same plan explaining the alternating pattern that appears in sections circa AP –3,3 (a). D: The hippocampus is continuous with the hippocampo-amygdaloid transitional area (HATA) through the *uncus* (3). The caudal *uncus* is the intralimbic gyrus (4), where the uncal apex is situated. Note that CA2 and CA3 fields (although modified) form a single rim in the uncal region. This continuity is obvious in sections taken around the transition between the prefimbrial and the perifimbrial hippocampus (b in D, circa AP –3,5). Around AP –3,6 (c), the *margo denticulatus* (MD) bends medially and coats the lateral, ventral and medial surfaces of the *uncus*, forming the Band of Giacomini (BG). E offers a free interpretation of the rostral hippocampus as the head of a seahorse.

**
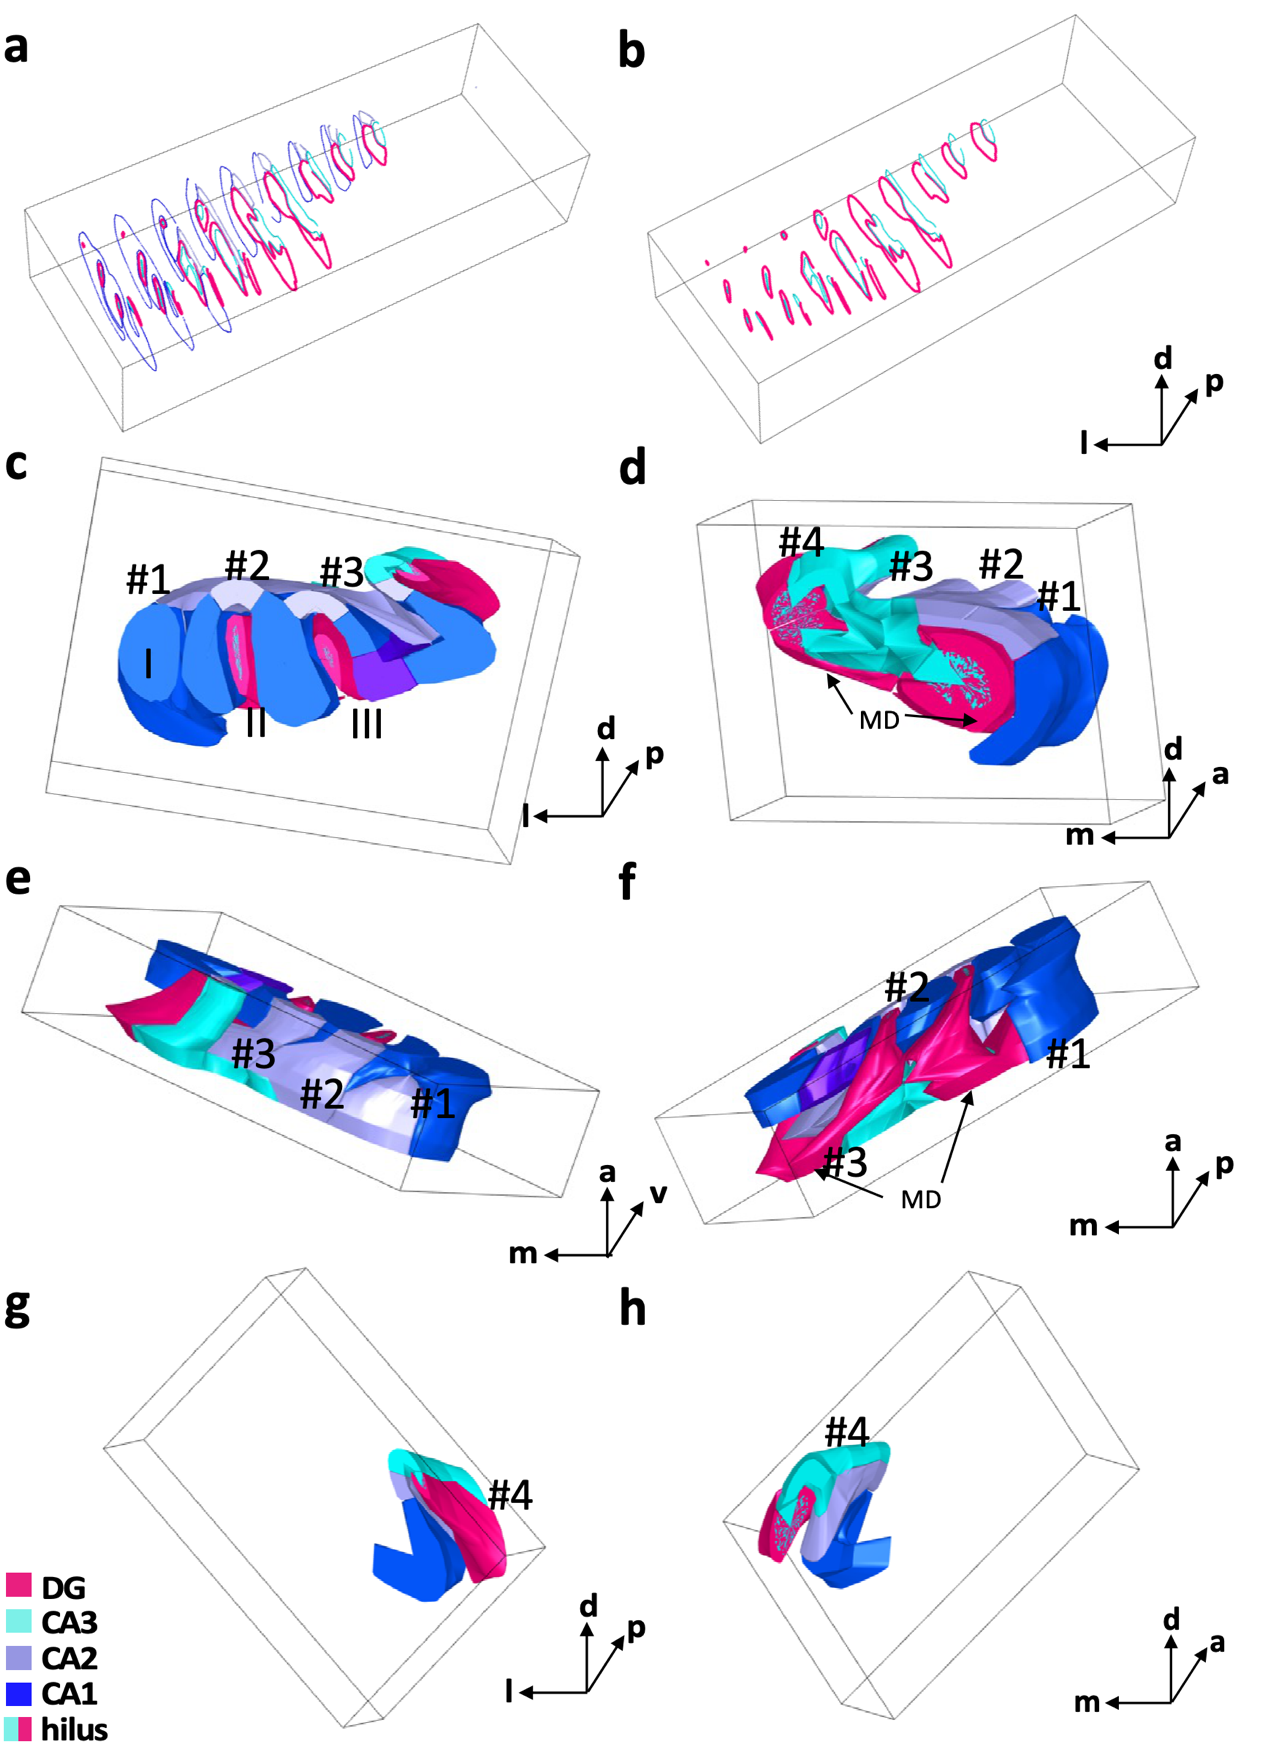
**

**Supplementary Fig. 5:** 3-D reconstruction of the anterior hippocampal region (generated by FreeD software, Andrey and Maurin, 2005).

**
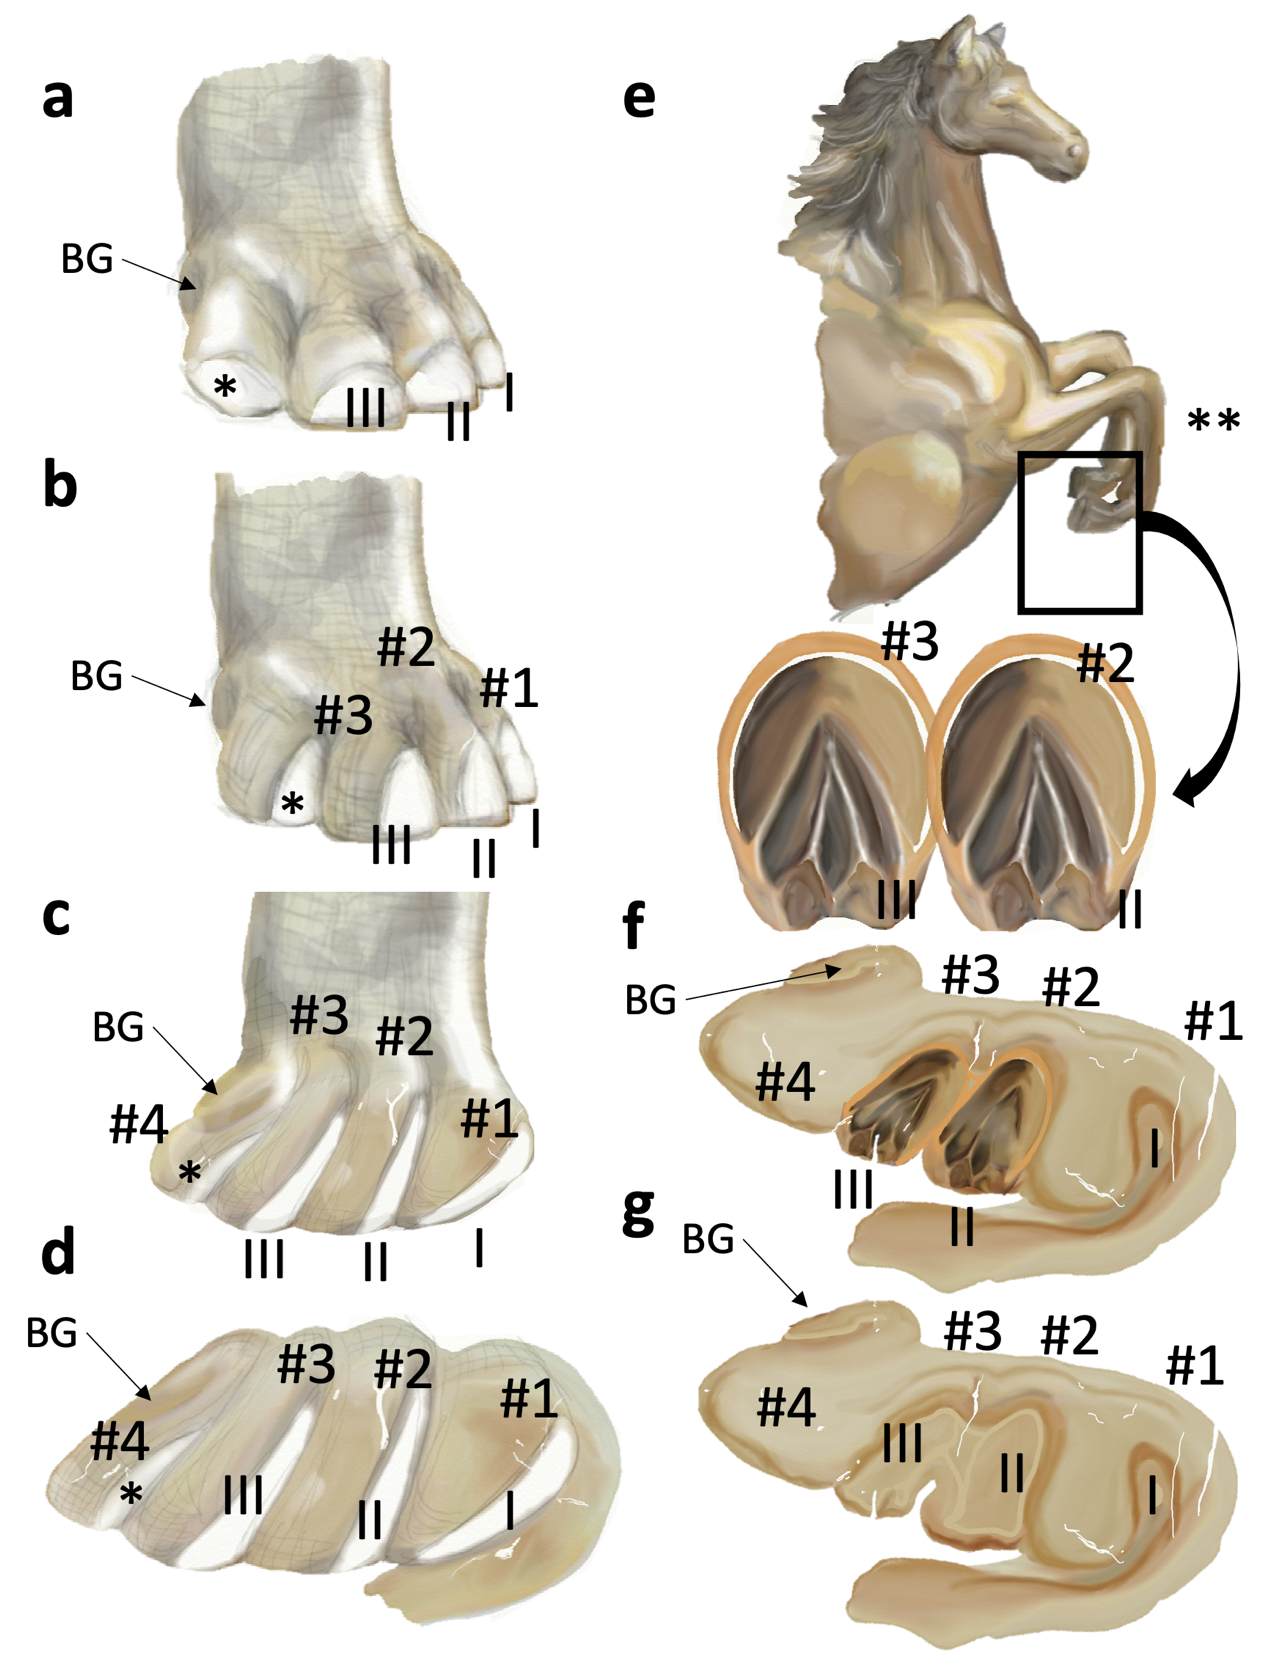
**

**Supplementary Fig. 6:** How the head became the feet. The rostral hippocampus may be also compared to the foot of pachyderm (A-D) or the hooves (E-G) of a rampant horse. Both series of diagrammatic representations explain how the indentations of the hippocampal head (#1 to #4) can be also compared to fingers or digitationes (I-II-III) with the rostral dentate gyrus representing the nails (C) or the hooves (F). Not that in this work we have restricted the term digitations to the dentate gyrus structures (I-II-III) considering the overlying relief (#1 to #4) as indentation. The band of Giacomini and the vertical hippocampus in #4 (in the *uncus*) probably correspond to the greater hippocampal toe as defined by Malacarne (1780). Note the similarity between the horse legs and the appearance of the macrodissected human hippocampus (**).

**
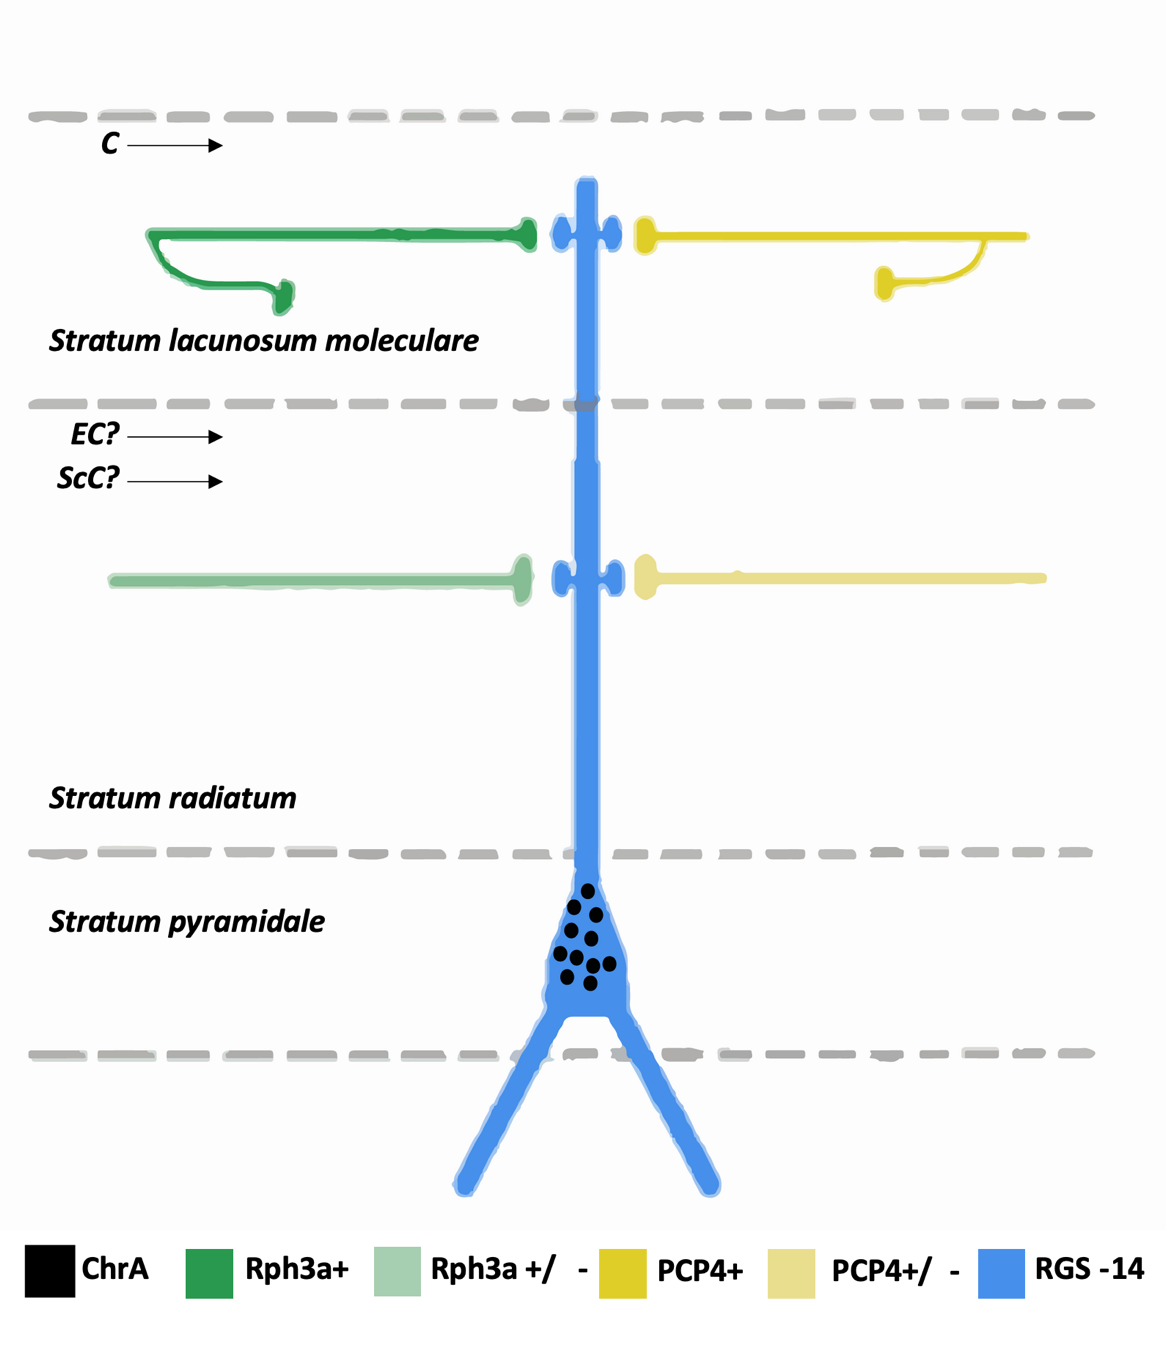
 Supplementary Fig. 7**: Main immunohistochemical features of hippocampal CA2 a,b (lateral CA2). The *stratum lacunosum moleculare*, which mainly contains synapses between pyramidal cells and fibres arising from the periarchicortex (C), shows dense PCP4+, Rph3a+ neuropil. The *stratum radiatum* forms closer to the pyramidal cell soma and its main feature is the presence of a faintly neuropil for both proteins. The *stratum radiatum* contains in CA2 projections either from Schaffer collaterals or from the entorhinal cortex. The whole pyramidal neuron shows RGS-14 reactivity, while its soma shows punctate cytoplasmic expression of Chromogranin A.

Supplementary Table 1: Summary of cases.

| ***Case*** | ***Age*** | ***Sex*** | ***Cause of death*** | ***Post-mortem delay (h)*** | ***Fixation method*** | ***Paraffin embedding*** | ***Sectioning*** |
| --- | --- | --- | --- | --- | --- | --- | --- |
| **P1** | 58 | Male | Polycythemia Vera | 2,5 | Trans-carotid and basilar perfusion | No | 50 μm sections in parallel series, stereotaxic slicing |
| **P2** | 67 | Male | Septicemia | 3,5 | Trans-carotid and basilar perfusion | No | 50 μm sections in parallel series, stereotaxic slicing |
| **If1** | 58 | Female | Pneumonia | 4,5 | Immersion | No | 50 μm consecutive sections, no stereotaxic slicing |
| **If2** | 29 | Male | Subdural bleeding | 4 | Immersion | No | 50 μm consecutive sections, no stereotaxic slicing |
| **If3** | 32 | Male | Enterocolitis | 5 | Immersion | No | 50 μm consecutive sections, no stereotaxic slicing |
| **If4** | 68 | Male | Dilated cardiomyopathy | 16 | Immersion | No | 50 μm consecutive sections, no stereotaxic slicing |
| **If5** | 71 | Male | Metastatic disease of unknown origin | 5 | Immersion | No | 50 μm consecutive sections, no stereotaxic slicing |
| **Pf1** | 42 | Male | Unknown | 4,5 | Immersion | Yes | 20 μm selected sections, no stereotaxic slicing |
| **Pf2** | 60 | Female | Unknown | 11,5 | Immersion | Yes | 20 μm selected sections, no stereotaxic slicing |
| **Pf3** | 52 | Female | Unknown | 5,5 | Immersion | Yes | 20 μm selected sections, no stereotaxic slicing |
| **Pf4** | 52 | Male | Unknown | 4,5 | Immersion | Yes | 20 μm selected sections, no stereotaxic slicing |
| **F19** | 65 | Male | Metastatic disease of unknown origin | 4 | Trans-femoral perfusion | No | Macroscopic exam |

Supplementary Table 2: Battery of antibodies used in this work

| ***Protein*** | ***Antibody***  ***(Reference & dilution)*** | ***Expression pattern***  ***(Murine hippocampus)*** | ***Expression pattern***  ***(Human hippocampus)*** |
| --- | --- | --- | --- |
| *Astn 2* | anti-Astn2 ab121906 rabbit polyclonal 1/10 – 1/50 | mRNA differential expression along longitudinal axis1 | Not found |
| *Nr3c2* | anti- mineralocorticoid receptor, Nr3c2 mouse monoclonal H10E4C9F 1/500 | mRNA differential expression along longitudinal axis1 | Dense fiber plexus in Deep pyramidal layers / *stratum oriens.* No pattern overall. |
| *Wfs-1* | anti-Wfs1 rabbit polyclonal PA5-6064 1/1750 | mRNA expression in dorsal murine hippocampus1 | Strong expression in non-pyramidal hiliar cells in both hippocampal body and posterior hippocampus. Dense fibrillar plexus around cellular layers of posterior hippocampus |
| *Coll11A1* | anti-Col11A1 rabbit polyclonal LS-C352032 1/100 | mRNA differential expression along longitudinal axis and different *laminae*2 | Scattered hiliar cells  Scattered fibers in pyramidal layers Subicular pyramidal cells. No pattern overall. |
| *Neurotensin* | anti-neurotensin mouse monoclonal SAB4200703 1/500 | Subicular layers 1-3 in dorsal murine hippocampus1,2 | Subicular pyramidal cells, with no laminar or longitudinal pattern |
| *Dlk1* | anti-Dlk1 mouse monoclonal 3A10 1/100- 1/200 | Subicular layer 22 | Not found |
| *Coch1* | anti-Coch1 mouse monoclonal ab195959 1/50-1/200 | mRNA differential expression along longitudinal axis and different *laminae*1,2 | Scattered non-pyramidal cells with no identifiable pattern |
| *Dclk3* | anti-Dclk3 ab113367 rabbit polyclonal 1/150 | Pyramidal cells in dorsal CA1 fields2 | Widespread cytoplasmic reactivity in pyramidal cells, stronger in CA3 cells. No identifiable pattern |
| ***Rph3a*** | **anti-Rph3a rabbit polyclonal HPA002475 1/500** | **Laminar patterns in ventral pyramidal layers2** | **See Results** |
| *Amigo1* | anti-Amigo1 rabbit polyclonal HPA046152 1/1000 | CA21 | Widespread nuclear staining of pyramidal cells, with neither field, nor laminar specificity. |
| *Itga7* | anti-Itga7 r mouse monoclonal ab195959 1/500 | Laminar pattern in pyramidal cell layers1,2 | Scattered fibers with no pattern |
| ***PCP4*** | **anti-PCP4 rabbit polyclonal HPA005792 rabbit polyclonal 1/750** | **CA2 and subicular pyramidal cells3** | **See Results** |
| ***ChrA*** | **Mouse monoclonal LK2H10 Cell Marque 1/100** | **CA (mostly CA3) pyramidal neurons,**  **Neuropil * (WE-14, see discussion)4** | **See Results** |
| ***RGS-14*** | **Anti-RGS-14 Rabbit monoclonal 16258-1 1/150** | **CA2 and *fasciola cinerea*, CA1 (sparse) *5** | **See Results** |

**Supplementary Table 2 Legend:** Bold indicates patterned expression in human hippocampus. * indicates the utilization of a different badge compared to the one in which the mentioned pattern was described. (1: Fanselow and Dong, 2010; 2: Bienkowski et al, 2018; 3: Renelt et al 2014; 4: Munoz, 1990; 5: Evans et al, 2014;)

Supplementary Table 3: Main immunohistochemical features of the human dentate gyrus

| ***Marker*** | ***Layer*** | | |
| --- | --- | --- | --- |
|  | ***Molecular layer*** | ***Granule cell layer*** | ***Hilus*** |
| **PCP4** | Moderate neuropil staining | Cytoplasmic staining in granular cells | Light neuropil staining |
| **Rph3a** | Dense neuropil staining | No staining | Scattered interneurons |
| **ChrA** | No staining | No staining | No staining |
| **RGS-14** | Diffuse light neuropil staining | Diffuse light neuropil staining | Diffuse light neuropil staining |

Supplementary Table 4: Main immunohistochemical features of the human hippocampus proper

| ***Field*** | ***Marker*** | ***Layer*** | | |
| --- | --- | --- | --- | --- |
|  |  | **Molecular layer/*stratum lacunosum moleculare*** | ***Stratum radiatum*** | **Pyramidal cell layer** | **Plexiform layer/ *stratum oriens*** |
| **CA3h** | PCP4 | Dense neuropil staining | | |
| Rph3a | PV+ and PV- interneurons, dense neuropil staining, and ubiquitous terminals | | |
| ChrA | Ubiquitous staining in terminals and scant, scattered neurons | | |
| RGS-14 | Diffuse light neuropil staining | | |
| **CA3c** | PCP4 | No staining |  | No staining in pyramidal cells. Light neuropil staining | Light neuropil staining |
| Rph3a | Light neuropil staining | No staining in pyramidal cells. Light neuropil staining | Light neuropil staining |
| ChrA | No staining | Neuropil and terminals | No staining |
| RGS-14 | Light neuropil staining | Moderate to dense neuropil staining, no pyramidal cell staining | Light diffuse neuropil staining |
| **CA3 a,b** | PCP-4 | Light neuropil staining (superficial)  No staining (deep) |  | No staining in pyramidal cells. Light neuropil staining. Strong staining in deep and superficial mossy fibers. | No staining |
| Rph3a | Moderate neuropil staining (superficial)  Light neuropil staining (deep) | No staining in pyramidal cells. Light neuropil staining. Strong staining in deep and superficial mossy fibers. | Light neuropil staining |
| ChrA | No staining | Cytoplasmic staining in pyramidal cells. Scattered terminals. | No staining |
| RGS-14 | Subtle neuropil staining | Strong cytoplasmic staining in pyramidal cells (probably restricted to CA3a, see discussion) | Light neuropil staining |
| **CA2** | PCP4 | Light neuropil staining | Subtle neuropil staining | No staining | No staining |
| Rph3a | Moderate neuropil staining | Light neuropil staining (*) | Light neuropil staining (*) | No staining |
| ChrA | No staining | No staining | Cytoplasmic staining in pyramidal cells | No staining |
| RGS-14 | Moderate neuropil staining | Strong staining in basal segment of apical dendrites of pyramidal cells | Strong cytoplasmic staining in pyramidal cells | Light neuropil staining |
| **CA1** | PCP4 | Light staining | No staining | No staining | Scattered neurons, mostly ventromedially |
| Rph3a | Strong neuropil staining | Moderate neuropil staining | Moderate neuropil staining | No staining |
| ChrA | No staining (lateral-superficial)  Light staining (medial and lateral-deep) | Light neuropil staining | No staining | Scattered neurons |
| RGS-14 | No staining (lateral-superficial)  Moderate neuropil staining (medial) | Subtle neuropil staining | Strong neuropil staining | Light neuropil staining |
| **Subicular Complex** | PCP4 | No neuropil staining.  Apical processes of deep pyramidal cells ramifying in lateral subiculum |  | Cytoplasmic staining in deep pyramidal cells | Scattered neurons |
| Rph3a | No staining | Light neuropil staining | Light neuropil staining |
| ChrA | No staining | Scattered neurons in deep layers | Scattered neurons |
| RGS-14 | No staining (superficial)  Light neuropil staining (deep) | Strong-to-moderate neuropil staining | Light neuropil staining |

Supplementary Table 5: Coordinates of the main macro- and micro-anatomical landmarks in the hippocampal head

| ***Hippocampal region*** | ***Main anatomical landmarks*** | ***P1***  ***AP (cm)*** | ***P2***  ***AP (cm)*** |
| --- | --- | --- | --- |
| **Rostral pole** |  | -2,94 | -3,18 |
|  | Rostralmost hippocampal toes (II,III) | -2,97 | -3,25 |
| **Prefimbrial hippocampus** | Dentate gyrus granular cell layer in II, III | -3,07 | -3,32 |
| Rostral end of the first toe I | -3,2 | -3,3 |
| Rostral limit of CA2 | -3,2 | -3,4 |
| Granular cell layer in I | -3,4 | -3,48 |
| Caudal end of uSC | -3,45 | -3,57 |
| Caudal end of uCA1 | -3,5 | -3,63 |
| Rostral end of vertical hippocampus | *Circa* -3 | -3,08 |
| Continuity of CA2 as a single rim | *Circa* -3,34 | -3,5 |
| **Perifimbrial hippocampus** | Rostral end of uCA3 a,b and CA3 a,b | -3,47 | *Circa* -3,70 |
| Unification of the Band of Giacomini | -3,58 | -3,78 |
| Continuity of CA3 as a single rim | -3,64 | -3,78 |
| Continuity of the Hippocampal fissure | -3,65 | -3,8 |
| Uncal pole | -3,7 | -3,9 |

Supplementary Table 6: Main immunohistochemical features of hippocampal fields specific the rostral hippocampus/ hippocampal head

| ***Field*** | ***Marker*** | ***Layer*** | | |
| --- | --- | --- | --- | --- |
|  |  | **Molecular layer/*stratum lacunosum moleculare*** | **Pyramidal cell layer** | **Plexiform layer/ *stratum oriens*** |
| **vCA3c** | PCP4 | No staining | No staining | Not identifiable |
| Rph3a | No staining | No staining | Not identifiable |
| ChrA | No staining | Strong cytoplasmic staining, strong neuropil staining, ubiquitous terminals | Not identifiable |
| RGS-14 | Light neuropil staining | Moderate neuropil staining, scattered terminals | Light neuropil staining |
| **vCA3 a,b** | PCP-4 | Light neuropil staining (superficial)  No staining (deep) | No staining in pyramidal cells. Light neuropil staining. Strong staining in deep and superficial mossy fibers. | No staining |
| Rph3a | Moderate neuropil staining | Light neuropil staining | No staining |
| ChrA | No staining | Light neuropil staining. Scattered terminals. | No staining |
| RGS-14 | Subtle neuropil staining | Moderate neuropil staining | Light neuropil staining |
| **vCA2** | PCP4 | No staining | No staining | No staining |
| Rph3a | Moderate neuropil staining (superficial)  Light neuropil staining (deep) | Light neuropil staining (*) | No staining |
| ChrA | No staining (superficial)  Moderate neuropil staining | Cytoplasmic staining in pyramidal cells. Scattered terminals. Moderate neuropil staining. | No staining |
| RGS-14 | Moderate neuropil staining | Strong cytoplasmic staining in pyramidal cells. Moderate neuropil staining | Light neuropil staining |
| **vCA1** | PCP4 | Light neuropil staining | Cytoplasmic staining in deep pyramidal cells (progressively converging towards a superficial single PCP4- layer in vCA2) | No staining |
| Rph3a | Moderate neuropil staining  Moderate neuropil staining (medial) | Light neuropil staining | No staining |
| ChrA | Light neuropil staining (superficial)  No staining (deep) | Scattered non-pyramidal cells. Moderate neuropil staining | No staining |
| RGS-14 | Moderate neuropil staining | Moderate-to-strong neuropil staining | Light neuropil staining |
| **uCA1** | PCP4 | Moderate neuropil staining with prominently positive dendritic arborizations of pyramidal cells | Strong cytoplasmic staining in deep pyramidal cells | No staining |
| Rph3a | Strong diffuse neuropil staining | Moderate neuropil staining | Light neuropil staining |
| ChrA | No staining | Scattered non-pyramidal neurons | No staining |
| RGS-14 | Light neuropil staining (superficial)  Moderate neuropil staining (intermediate)  Light neuropil staining (deep) | Strong-to-moderate neuropil staining | Light neuropil staining |

Supplementary Table 7: Coordinates of the main macro and microanatomical landmarks in the posterior hippocampus/hippocampal tail

| ***Main anatomical landmarks*** | ***P1***  ***AP (cm)*** | ***P2***  ***AP (cm)*** |
| --- | --- | --- |
| Contact between *gyrus fasciolaris* and posterior hippocampus | -5,38 | -5,45 |
| Caudal end of the fimbria | -5,45 | -5,38 |
| Subcallosal hippocampus | -5,23 | -5,42 |
| Caudal end of CA3, continuity of posterior CA2 | -5,86 | -5,85 |
| Caudal end of CA1 | -5,7 | -5,85 |
| Caudal end of hippocampus (posterior subicular complex) | -5,9 | -6 |

Supplementary Table 8: Main immunohistochemical features of modified hippocampal fields in the hippocampal tail

|  | ***Marker*** | ***Layer*** | | |
| --- | --- | --- | --- | --- |
|  |  | **Molecular layer/*stratum lacunosum moleculare*** | **Pyramidal cell layer** | **Plexiform layer/ *stratum oriens*** |
| **fCA3** | PCP4 | No staining | Moderate neuropil staining. | Not identifiable |
| Rph3a | No staining | Sparse fibers | Not identifiable |
| ChrA | No staining | Strong cytoplasmic staining, moderate neuropil staining, ubiquitous terminals | Not identifiable |
| RGS-14 | No staining | Moderate neuropil staining, Deep pyramidal cells. | Not identifiable |
| **fCA2** | PCP-4 | Light-to-moderate neuropil staining | No staining | No staining |
| Rph3a | Moderate neuropil staining | Scattered fibers, terminations and neuropil throughout its whole depth | No staining |
| ChrA | No staining | Strong cytoplasmic punctate staining in pyramidal cells | No staining |
| RGS-14 | Moderate neuropil staining | Strong neuropil staining | Strong neuropil staining |
| **dpCA3** | PCP4 | No staining | No staining in pyramidal cells. Light neuropil staining | Light neuropil staining |
| Rph3a | Light neuropil staining | No staining in pyramidal cells. Light neuropil staining | Light neuropil staining |
| ChrA | No staining | Neuropil and terminals | No staining |
| RGS-14 | No staining | Moderate neuropil staining, cytoplasmic staining in deep pyramidal cells. | No staining |

Supplementary Table 9: Field distribution along the hippocampal longitudinal (caudo-rostral) axis

| ***Hippocampal region*** | | | |  | ***Hippocampal fields (+hippocampal fissure)*** | | | | |
| --- | --- | --- | --- | --- | --- | --- | --- | --- | --- |
| *Caudal hippocampus/ posterior hippocampus/ caudal hippocampus/ hippocampal tail* | *Subcallosal hippocampus* | | |  | Dentato-fasciolar sulcus | Fasciola cinerea | **fCA3** | **fCA2** | **dCA1** |
| *Posterior hippocampus* | Dorsal posterior hippocampus | |  | Posterior hippocampal fissure | Posterior dentate gyrus including posterior *margo denticulatus* | **dpCA3** | dpCA2/pCA2 | pCA1 |
| Ventral posterior hippocampus | |  |  |  | vpCA3 | vpCA2/pCA2 | pCA1 |
| *Hippocampal body/Middle hippocampus* | | | |  | Hippocampal fissure (outer Blade/Deep hippocampal fissure + inner Blade/superficial hippocampal fissure) | Dentate gyrus including *margo denticulatus* | CA3 | CA2 | CA1 |
| *Hippocampal head/ rostral hippocampus/ anterior hippocampus*/ *pes hippocampi* | *Perifimbrial hippocampus* | #4 (medial indentation | Vertical Hippocampus |  | Superficial hippocampal fissure | Inferior/lower Band of Giacomini | **vCA3** | **vCA2** | **vCA1** |
| Uncus |  |  |  | **uCA3** | uCA2 | **uCA1** |
| #1 (lateral indentation) |  |  | Deep hippocampal fissure | Dentate gyrus in the lateral hippocampal toe (I) | CA3 in the lateral hippocampal toe (I) | CA2 | CA1 |
| *Prefimbrial hippocampus* | #4 (medial indentation) | Vertical Hippocampus |  | Superficial hippocampal fissure | Upper/superior Band of Giacomini | **vCA3** | vCA2 | **vCA1** |
| Uncus |  | Superficial hippocampal fissure |  | **uCA3** | uCA2 | **uCA1** |
| Intralimbic gyrus |  | Superficial hippocampal fissure | Band of Giacomini | **uCA3, vCA3** |  |  |
| #2,3 (intermediate indentations) |  |  | Deep hippocampal fissure | Dentate gyrus in the medial hippocampal toes (II, III) | CA3 in the medial hippocampal toes (II, III) | CA2, uCA2 | CA1 |
| #1 (lateral indentation) |  |  | Deep hippocampal fissure | Dentate gyrus in the lateral hippocampal toe (I) | CA3 in the lateral hippocampal toe (I) | CA2 | CA1 |

**Supplementary Table 9 Legend:** Field distribution along the hippocampal longitudinal axis. Left columns include the different subregions of the human adult hippocampus along its longitudinal axis. Right columns include the different representatives of the hippocampal fissure and fields (hippocampal fissure 🡪 dentate gyrus 🡪 CA3 🡪 CA2 🡪 CA1). Bold indicates modified fields.
